# Supplementary material
Source: PubMed Central journal article supplement (PMC4135638)
Supplement: JB.01825-14_zjb999093258so1.pdf [file JB.01825-14_zjb999093258so1.pdf]

|            |                                                                                                                                                                                                                                                                                                                                                                                                                  |     |
|------------|------------------------------------------------------------------------------------------------------------------------------------------------------------------------------------------------------------------------------------------------------------------------------------------------------------------------------------------------------------------------------------------------------------------|-----|
| JC1        | MCSLLKKIVFSALLAAGPATSF <del>AA</del> Q <del>R</del> V <del>P</del> A <del>T</del> E <del>N</del> T <del>P</del> H <del>V</del> V <del>S</del> I <del>S</del> K <del>R</del> N <del>L</del> S <del>R</del> I <del>A</del> I <del>E</del> G <del>G</del> R <del>I</del> S <del>S</del> W <del>K</del> F <del>M</del> E                                                                                             | 61  |
| SK-93-1035 | MCSLLKKIVFSALLAAGPATSF <del>AA</del> Q <del>R</del> V <del>P</del> A <del>T</del> E <del>N</del> T <del>P</del> H <del>V</del> V <del>S</del> I <del>S</del> K <del>R</del> N <del>L</del> S <del>R</del> I <del>A</del> I <del>E</del> G <del>G</del> R <del>I</del> S <del>S</del> W <del>K</del> F <del>M</del> E                                                                                             | 61  |
| DGI2       | MCSLLKKIVFSALLAAGPATSF <del>AA</del> Q <del>R</del> V <del>P</del> T <del>T</del> E <del>N</del> T <del>P</del> H <del>V</del> V <del>S</del> I <del>S</del> K <del>R</del> N <del>L</del> S <del>R</del> I <del>A</del> I <del>E</del> G <del>G</del> R <del>I</del> S <del>S</del> W <del>K</del> F <del>M</del> E                                                                                             | 61  |
| PID18      | MCSLLKKIVFSALLAAGPATSF <del>AA</del> Q <del>R</del> V <del>P</del> T <del>T</del> E <del>N</del> T <del>P</del> H <del>V</del> V <del>S</del> I <del>S</del> K <del>R</del> N <del>L</del> S <del>R</del> I <del>A</del> I <del>E</del> G <del>G</del> R <del>I</del> S <del>S</del> W <del>K</del> F <del>M</del> E                                                                                             | 61  |
| PID2059    | MCSLLKKIVFSALLAAGPATSF <del>AA</del> Q <del>R</del> V <del>P</del> A <del>T</del> E <del>N</del> T <del>P</del> H <del>V</del> V <del>S</del> I <del>S</del> K <del>R</del> N <del>L</del> S <del>R</del> I <del>A</del> I <del>E</del> G <del>G</del> R <del>I</del> S <del>S</del> W <del>K</del> F <del>M</del> E                                                                                             | 61  |
| MS11       | MCSLLKKIVFSALLAAGPATSF <del>AA</del> Q <del>R</del> V <del>P</del> A <del>T</del> E <del>N</del> T <del>P</del> H <del>V</del> V <del>S</del> I <del>S</del> K <del>R</del> N <del>L</del> S <del>R</del> I <del>A</del> I <del>E</del> G <del>G</del> R <del>I</del> S <del>S</del> W <del>K</del> F <del>M</del> E                                                                                             | 61  |
| PID1       | MCSLLKKIVFSALLAAGPATSF <del>AA</del> Q <del>R</del> V <del>P</del> A <del>T</del> E <del>N</del> T <del>P</del> H <del>V</del> V <del>S</del> I <del>S</del> K <del>R</del> N <del>L</del> S <del>R</del> I <del>A</del> I <del>E</del> G <del>G</del> R <del>I</del> S <del>S</del> W <del>K</del> F <del>M</del> E                                                                                             | 61  |
| PID332     | MCSLLKKIVFSALLAAGPATSF <del>AA</del> Q <del>R</del> V <del>P</del> A <del>T</del> E <del>N</del> T <del>P</del> H <del>V</del> V <del>S</del> I <del>S</del> K <del>R</del> N <del>L</del> S <del>R</del> I <del>A</del> I <del>E</del> G <del>G</del> R <del>I</del> S <del>S</del> W <del>K</del> F <del>M</del> E                                                                                             | 61  |
| NCCP11945  | MCSLLKKIVFSALLAAGPATSF <del>AA</del> Q <del>R</del> V <del>P</del> A <del>T</del> E <del>N</del> T <del>P</del> H <del>V</del> V <del>S</del> I <del>S</del> K <del>R</del> N <del>L</del> S <del>R</del> I <del>A</del> I <del>E</del> G <del>G</del> R <del>I</del> S <del>S</del> W <del>K</del> F <del>M</del> E                                                                                             | 61  |
| FA19       | MCSLLKKIVFSALLAAGPATSF <del>AA</del> Q <del>R</del> V <del>P</del> A <del>T</del> E <del>N</del> T <del>P</del> H <del>V</del> V <del>S</del> I <del>S</del> K <del>R</del> N <del>L</del> S <del>R</del> I <del>A</del> I <del>E</del> G <del>G</del> R <del>I</del> S <del>S</del> W <del>K</del> F <del>M</del> E                                                                                             | 61  |
| MC         | ...LLKKIVFSALLVAGP <del>T</del> T <del>T</del> S <del>F</del> A <del>A</del> Q <del>R</del> V <del>P</del> A <del>T</del> E <del>N</del> T <del>P</del> H <del>V</del> V <del>S</del> I <del>S</del> K <del>R</del> N <del>L</del> S <del>R</del> I <del>A</del> I <del>E</del> G <del>G</del> R <del>I</del> S <del>S</del> W <del>K</del> F <del>M</del> E                                                     | 58  |
|            |                                                                                                                                                                                                                                                                                                                                                                                                                  |     |
| JC1        | GDLELQKDTT <del>T</del> TGQLFVRS <del>L</del> T <del>S</del> N <del>P</del> T <del>N</del> L <del>F</del> V <del>I</del> S <del>E</del> E <del>G</del> K <del>T</del> Y <del>L</del> L <del>V</del> L <del>K</del> P <del>T</del> S <del>K</del> Q <del>G</del> D <del>N</del> I <del>V</del> D <del>V</del> A <del>G</del> A <del>N</del> R <del>R</del> E                                                      | 122 |
| SK-93-1035 | GDLELQKDTT <del>T</del> TGQLFVRS <del>L</del> T <del>S</del> N <del>P</del> T <del>N</del> L <del>F</del> V <del>I</del> S <del>E</del> E <del>G</del> K <del>T</del> Y <del>L</del> L <del>V</del> L <del>K</del> P <del>T</del> S <del>K</del> Q <del>G</del> D <del>N</del> I <del>V</del> D <del>V</del> A <del>G</del> A <del>N</del> R <del>R</del> E                                                      | 122 |
| DGI2       | GDLELQKDTT <del>T</del> TGQLFVRS <del>L</del> T <del>S</del> N <del>P</del> T <del>N</del> L <del>F</del> V <del>I</del> S <del>E</del> E <del>G</del> K <del>T</del> Y <del>L</del> L <del>V</del> L <del>K</del> P <del>T</del> S <del>K</del> Q <del>G</del> <del>N</del> N <del>I</del> V <del>D</del> V <del>A</del> G <del>A</del> N <del>R</del> R <del>E</del>                                           | 122 |
| PID18      | GDLELQKDTT <del>T</del> TGQLFVRS <del>L</del> T <del>S</del> N <del>P</del> T <del>N</del> L <del>F</del> V <del>I</del> S <del>E</del> E <del>G</del> K <del>T</del> Y <del>L</del> L <del>V</del> L <del>K</del> P <del>T</del> S <del>K</del> Q <del>G</del> <del>N</del> N <del>I</del> V <del>D</del> V <del>A</del> G <del>A</del> N <del>R</del> R <del>E</del>                                           | 122 |
| PID2059    | GDLELQKDTT <del>T</del> TGQLFVRS <del>L</del> T <del>S</del> N <del>P</del> T <del>N</del> L <del>F</del> V <del>I</del> S <del>E</del> E <del>G</del> K <del>T</del> Y <del>L</del> L <del>V</del> L <del>K</del> P <del>T</del> S <del>K</del> Q <del>G</del> D <del>N</del> I <del>V</del> D <del>V</del> A <del>G</del> A <del>N</del> R <del>R</del> E                                                      | 122 |
| MS11       | GDLELQKDTT <del>T</del> TGQLFVRS <del>L</del> T <del>S</del> N <del>P</del> T <del>N</del> L <del>F</del> V <del>I</del> S <del>E</del> E <del>G</del> K <del>T</del> Y <del>L</del> L <del>V</del> L <del>K</del> P <del>T</del> S <del>K</del> Q <del>G</del> D <del>N</del> I <del>V</del> D <del>V</del> A <del>G</del> A <del>N</del> R <del>R</del> E                                                      | 122 |
| PID1       | GDLELQKDTT <del>T</del> TGQLFVRS <del>L</del> T <del>S</del> N <del>P</del> T <del>N</del> L <del>F</del> V <del>I</del> S <del>E</del> E <del>G</del> K <del>T</del> Y <del>L</del> L <del>V</del> L <del>K</del> P <del>T</del> S <del>K</del> Q <del>G</del> D <del>N</del> I <del>V</del> D <del>V</del> A <del>G</del> A <del>N</del> R <del>R</del> E                                                      | 122 |
| PID332     | GDLELQKDTT <del>T</del> TGQLFVRS <del>L</del> T <del>S</del> N <del>P</del> T <del>N</del> L <del>F</del> V <del>I</del> S <del>E</del> E <del>G</del> K <del>T</del> Y <del>L</del> L <del>V</del> L <del>K</del> P <del>T</del> S <del>K</del> Q <del>G</del> D <del>N</del> I <del>V</del> D <del>V</del> A <del>G</del> A <del>N</del> R <del>R</del> E                                                      | 122 |
| NCCP11945  | GDLELQKDTT <del>T</del> TGQLFVRS <del>L</del> T <del>S</del> N <del>P</del> T <del>N</del> L <del>F</del> V <del>I</del> S <del>E</del> E <del>G</del> K <del>T</del> Y <del>L</del> L <del>V</del> L <del>K</del> P <del>T</del> S <del>K</del> Q <del>G</del> D <del>N</del> I <del>V</del> D <del>V</del> A <del>G</del> A <del>N</del> R <del>R</del> E                                                      | 122 |
| FA19       | GDLELQKDTT <del>T</del> TGQLFVRS <del>L</del> T <del>S</del> N <del>P</del> T <del>N</del> L <del>F</del> V <del>I</del> S <del>E</del> E <del>G</del> K <del>T</del> Y <del>L</del> L <del>V</del> L <del>K</del> P <del>T</del> S <del>K</del> Q <del>G</del> D <del>N</del> I <del>V</del> D <del>V</del> A <del>G</del> A <del>N</del> R <del>R</del> E                                                      | 122 |
| MC         | GDLELQKDTT <del>T</del> TGQLFVRS <del>L</del> T <del>S</del> <del>S</del> P <del>T</del> N <del>L</del> F <del>V</del> V <del>S</del> E <del>E</del> G <del>K</del> T <del>Y</del> L <del>L</del> V <del>L</del> K <del>P</del> T <del>S</del> K <del>Q</del> G <del>D</del> N <del>I</del> V <del>D</del> V <del>A</del> G <del>A</del> N <del>R</del> <del>H</del> E                                           | 119 |
|            |                                                                                                                                                                                                                                                                                                                                                                                                                  |     |
| JC1        | AAVLASQTGMPV <del>T</del> MN <del>S</del> T <del>E</del> Y <del>V</del> R <del>A</del> I <del>K</del> K <del>M</del> M <del>T</del> S <del>M</del> M <del>R</del> G <del>T</del> T <del>G</del> D <del>M</del> G <del>I</del> N <del>H</del> S <del>H</del> E <del>Y</del> Q <del>T</del> V <del>P</del> L <del>W</del> K <del>D</del> T <del>L</del> F <del>I</del> Q <del>N</del>                              | 183 |
| SK-93-1035 | AAVLASQTGMPV <del>T</del> MN <del>S</del> T <del>E</del> Y <del>V</del> R <del>A</del> I <del>K</del> K <del>M</del> M <del>T</del> S <del>M</del> M <del>R</del> G <del>T</del> T <del>G</del> D <del>M</del> G <del>I</del> N <del>H</del> S <del>H</del> E <del>Y</del> Q <del>T</del> V <del>P</del> L <del>W</del> K <del>D</del> T <del>L</del> F <del>I</del> Q <del>N</del>                              | 183 |
| DGI2       | AAVLASQTGMPV <del>T</del> MN <del>S</del> T <del>E</del> Y <del>V</del> R <del>A</del> I <del>K</del> K <del>M</del> M <del>A</del> S <del>M</del> M <del>R</del> G <del>T</del> T <del>G</del> D <del>M</del> G <del>I</del> N <del>H</del> S <del>H</del> E <del>Y</del> Q <del>T</del> V <del>P</del> L <del>W</del> K <del>D</del> T <del>L</del> F <del>I</del> Q <del>N</del>                              | 183 |
| PID18      | AAVLASQTGMPV <del>T</del> MN <del>S</del> T <del>E</del> Y <del>V</del> R <del>A</del> I <del>K</del> K <del>M</del> M <del>A</del> S <del>M</del> M <del>R</del> G <del>T</del> T <del>G</del> D <del>M</del> G <del>I</del> N <del>H</del> S <del>H</del> E <del>Y</del> Q <del>T</del> V <del>P</del> L <del>W</del> K <del>D</del> T <del>L</del> F <del>I</del> Q <del>N</del>                              | 183 |
| PID2059    | AAVLASQTGMPV <del>T</del> MN <del>S</del> T <del>E</del> Y <del>V</del> R <del>A</del> I <del>K</del> K <del>M</del> M <del>A</del> S <del>M</del> M <del>R</del> G <del>T</del> T <del>G</del> D <del>M</del> G <del>I</del> N <del>H</del> S <del>H</del> E <del>Y</del> Q <del>T</del> V <del>P</del> L <del>W</del> K <del>D</del> T <del>L</del> F <del>I</del> Q <del>N</del>                              | 183 |
| MS11       | AAVLASQTGMPV <del>T</del> MN <del>S</del> T <del>E</del> Y <del>V</del> R <del>A</del> I <del>K</del> K <del>M</del> M <del>A</del> S <del>M</del> M <del>R</del> G <del>T</del> T <del>G</del> D <del>M</del> G <del>I</del> N <del>H</del> S <del>H</del> E <del>Y</del> Q <del>T</del> V <del>P</del> L <del>W</del> K <del>D</del> T <del>L</del> F <del>I</del> Q <del>N</del>                              | 183 |
| PID1       | AAVLASQTGMPV <del>T</del> MN <del>S</del> T <del>E</del> Y <del>V</del> R <del>A</del> I <del>K</del> K <del>M</del> M <del>A</del> S <del>M</del> M <del>R</del> G <del>T</del> T <del>G</del> D <del>M</del> G <del>I</del> N <del>H</del> S <del>H</del> E <del>Y</del> Q <del>T</del> V <del>P</del> L <del>W</del> K <del>N</del> T <del>L</del> F <del>I</del> Q <del>N</del>                              | 183 |
| PID332     | AAVLASQTGMPV <del>T</del> MN <del>S</del> T <del>E</del> Y <del>V</del> R <del>A</del> I <del>K</del> K <del>M</del> M <del>A</del> S <del>M</del> M <del>R</del> G <del>T</del> T <del>G</del> D <del>M</del> G <del>I</del> N <del>H</del> S <del>H</del> E <del>Y</del> Q <del>T</del> V <del>P</del> L <del>W</del> K <del>N</del> T <del>L</del> F <del>I</del> Q <del>N</del>                              | 183 |
| NCCP11945  | AAVLASQTGMPV <del>T</del> MN <del>S</del> T <del>E</del> Y <del>V</del> R <del>A</del> I <del>K</del> K <del>M</del> M <del>A</del> S <del>M</del> M <del>R</del> G <del>T</del> T <del>G</del> D <del>M</del> G <del>I</del> N <del>H</del> S <del>H</del> E <del>Y</del> Q <del>T</del> V <del>P</del> L <del>W</del> K <del>N</del> T <del>L</del> F <del>I</del> Q <del>N</del>                              | 183 |
| FA19       | AAVLASQTGMPV <del>T</del> MN <del>S</del> T <del>E</del> Y <del>V</del> R <del>A</del> I <del>K</del> K <del>M</del> M <del>A</del> S <del>M</del> M <del>R</del> G <del>T</del> T <del>G</del> D <del>M</del> G <del>I</del> N <del>H</del> S <del>H</del> E <del>Y</del> Q <del>T</del> V <del>P</del> L <del>W</del> K <del>N</del> T <del>L</del> F <del>I</del> Q <del>N</del>                              | 183 |
| MC         | AAVLAS <del>R</del> TGMPV <del>T</del> MN <del>S</del> T <del>E</del> Y <del>V</del> R <del>T</del> I <del>K</del> K <del>M</del> M <del>T</del> S <del>M</del> M <del>R</del> G <del>T</del> T <del>G</del> D <del>M</del> G <del>I</del> N <del>H</del> S <del>H</del> E <del>Y</del> Q <del>T</del> I <del>P</del> L <del>W</del> K <del>N</del> T <del>L</del> F <del>I</del> Q <del>N</del>                 | 180 |
|            |                                                                                                                                                                                                                                                                                                                                                                                                                  |     |
| JC1        | GSYTAADM <del>Q</del> GLS <del>F</del> TL <del>T</del> NL <del>G</del> T <del>K</del> Q <del>L</del> E <del>I</del> R <del>E</del> Q <del>E</del> F <del>Y</del> R <del>Q</del> G <del>V</del> L <del>A</del> V <del>A</del> V <del>R</del> K <del>Q</del> I <del>L</del> Q <del>P</del> G <del>E</del> I <del>T</del> D <del>V</del> F <del>I</del> I <del>S</del> R <del>P</del> G <del>G</del>                | 244 |
| SK-93-1035 | GSYTAADM <del>Q</del> GLS <del>F</del> TL <del>T</del> NL <del>G</del> T <del>K</del> Q <del>L</del> E <del>I</del> R <del>E</del> Q <del>E</del> F <del>Y</del> R <del>Q</del> G <del>V</del> L <del>A</del> V <del>A</del> V <del>R</del> K <del>Q</del> I <del>L</del> Q <del>P</del> G <del>E</del> I <del>T</del> D <del>V</del> F <del>I</del> I <del>S</del> R <del>P</del> G <del>G</del>                | 244 |
| DGI2       | GSYTAADM <del>Q</del> GLS <del>F</del> TL <del>T</del> NL <del>G</del> T <del>K</del> Q <del>L</del> E <del>I</del> R <del>E</del> Q <del>E</del> F <del>Y</del> R <del>Q</del> G <del>V</del> L <del>A</del> V <del>A</del> V <del>R</del> K <del>Q</del> I <del>L</del> Q <del>P</del> G <del>E</del> I <del>T</del> D <del>V</del> F <del>I</del> I <del>S</del> R <del>P</del> G <del>G</del>                | 244 |
| PID18      | GSYTAADM <del>Q</del> GLS <del>F</del> TL <del>T</del> NL <del>G</del> T <del>K</del> Q <del>L</del> E <del>I</del> R <del>E</del> Q <del>E</del> F <del>Y</del> R <del>Q</del> G <del>V</del> L <del>A</del> V <del>A</del> V <del>R</del> K <del>Q</del> I <del>L</del> Q <del>P</del> G <del>E</del> I <del>T</del> D <del>V</del> F <del>I</del> I <del>S</del> R <del>P</del> G <del>G</del>                | 244 |
| PID2059    | GSYTAADM <del>Q</del> GLS <del>F</del> S <del>F</del> TL <del>T</del> NL <del>G</del> T <del>K</del> Q <del>L</del> E <del>I</del> R <del>E</del> Q <del>E</del> F <del>Y</del> R <del>Q</del> G <del>V</del> L <del>A</del> V <del>A</del> V <del>R</del> K <del>Q</del> I <del>L</del> Q <del>P</del> G <del>E</del> I <del>T</del> D <del>V</del> F <del>I</del> I <del>S</del> R <del>P</del> G <del>G</del> | 244 |
| MS11       | GSYTAADM <del>Q</del> GLS <del>F</del> TL <del>T</del> NL <del>G</del> T <del>K</del> Q <del>L</del> E <del>I</del> R <del>E</del> Q <del>E</del> F <del>Y</del> R <del>Q</del> G <del>V</del> L <del>A</del> V <del>A</del> V <del>R</del> K <del>Q</del> I <del>L</del> Q <del>P</del> G <del>E</del> I <del>T</del> D <del>V</del> F <del>I</del> I <del>S</del> R <del>P</del> G <del>G</del>                | 244 |
| PID1       | GSYTAADM <del>Q</del> GLS <del>F</del> TL <del>T</del> NL <del>G</del> T <del>K</del> Q <del>L</del> E <del>I</del> R <del>E</del> Q <del>E</del> F <del>Y</del> R <del>Q</del> G <del>V</del> L <del>A</del> V <del>A</del> V <del>R</del> K <del>Q</del> I <del>L</del> Q <del>P</del> G <del>E</del> I <del>T</del> D <del>V</del> F <del>I</del> I <del>S</del> R <del>P</del> G <del>G</del>                | 244 |
| PID332     | GSYTAADM <del>Q</del> GLS <del>F</del> TL <del>T</del> NL <del>G</del> T <del>K</del> Q <del>L</del> E <del>I</del> R <del>E</del> Q <del>E</del> F <del>Y</del> R <del>Q</del> G <del>V</del> L <del>A</del> V <del>A</del> V <del>R</del> K <del>Q</del> I <del>L</del> Q <del>P</del> G <del>E</del> I <del>T</del> D <del>V</del> F <del>I</del> I <del>S</del> R <del>P</del> G <del>G</del>                | 244 |
| NCCP11945  | GSYTAADM <del>Q</del> GLS <del>F</del> TL <del>T</del> NL <del>G</del> T <del>K</del> Q <del>L</del> E <del>I</del> R <del>E</del> Q <del>E</del> F <del>Y</del> R <del>Q</del> G <del>V</del> L <del>A</del> V <del>A</del> V <del>R</del> K <del>Q</del> I <del>L</del> Q <del>P</del> G <del>E</del> I <del>T</del> D <del>V</del> F <del>I</del> I <del>S</del> R <del>P</del> G <del>G</del>                | 244 |
| FA19       | GSYTAADM <del>Q</del> GLS <del>F</del> TL <del>T</del> NL <del>G</del> T <del>K</del> Q <del>L</del> E <del>I</del> R <del>E</del> Q <del>E</del> F <del>Y</del> R <del>Q</del> G <del>V</del> L <del>A</del> V <del>A</del> V <del>R</del> K <del>Q</del> I <del>L</del> Q <del>P</del> G <del>E</del> I <del>T</del> D <del>V</del> F <del>I</del> I <del>S</del> R <del>P</del> G <del>G</del>                | 244 |
| MC         | GSYTAADM <del>Q</del> GLS <del>F</del> TL <del>T</del> NL <del>G</del> T <del>K</del> Q <del>L</del> E <del>I</del> R <del>E</del> Q <del>E</del> F <del>Y</del> R <del>Q</del> G <del>V</del> L <del>A</del> V <del>A</del> V <del>R</del> K <del>Q</del> I <del>L</del> Q <del>P</del> G <del>E</del> I <del>T</del> D <del>V</del> F <del>I</del> I <del>S</del> R <del>L</del> G <del>G</del>                | 241 |

**Figure S1.** Alignment of the amino acid sequence of TraK from eight sequenced *Neisseria gonorrhoeae* strains carrying the GGI and two *N. gonorrhoeae* strains (JC1 and PID2059) for which we sequenced the *traK* locus. A representative *N. meningitidis* strain (MC:  $\alpha$ 275) is included for reference. In some strains of *N. meningitidis*, including  $\alpha$ 275, an insertion sequence is present at the start of the *traK* gene (1). Non-conserved amino acids are highlighted in gray.

|            |                                                                                                |     |
|------------|------------------------------------------------------------------------------------------------|-----|
| DGI2       | MMRLKALSITAAAILILSGCSTLTMSGIGGSEKFRCPNARNSDDPYCESISSNYKASVAGV                                  | 60  |
| FA19       | MMRLKALSITAAAILILSGCSTLTMSGIGGSEKFRCPNARNSDDPYCESISSNYKASVAGV                                  | 60  |
| MS11       | MMRLKALSITAAAILILSGCSTLTMSGIGGSEKFRCPNARNSDDPYCESISSNYKASVAGV                                  | 60  |
| NCCP11945  | MMRLKALSITAAAILILSGCSTLTMSGIGGSEKFRCPNARNSDDPYCESISSNYKASVAGV                                  | 60  |
| PID1       | MMRLKALSITAAAILILSGCSTLTMSGIGGSEKFRCPNARNSDDPYCESISSNYKASVAGV                                  | 60  |
| PID18      | MMRLKALSITAAAILILSGCSTLTMSGIGGSEKFRCPNARNSDDPYCESISSNYKASVAGV                                  | 60  |
| PID332     | MMRLKALSITAAAILILSGCSTLTMSGIGGSEKFRCPNARNSDDPYCESISSNYKASVAGV                                  | 60  |
| SK-93-1035 | MMRLKALSITAAAILILSGCSTLTMSGIGGSEKFRCPNARNSDDPYCESISSNYKASVAGV                                  | 60  |
| MC         | MMRLKALSITAAAILILSGCSTLTMSGIGGSEKFRCS <b>NAW</b> NSDDPYCESISSNYKASVAGV                         | 60  |
|            |                                                                                                |     |
| DGI2       | LKDGMRQVGQPYTDQSVRTLMLTQAYSSGTPVRSQSEIARIWVAPYLDTDGDLNDQSFT                                    | 120 |
| FA19       | LKDGMRQVGQPYTDQSVRTLMLTQAYSSGTPVRSQSEIARIWVAPYLDTDGDLNDQSFT                                    | 120 |
| MS11       | LKDGMRQVGQPYTDQSVRTLMLTQAYSSGTPVRSQSEIARIWVAPYLDTDGDLNDQSFT                                    | 120 |
| NCCP11945  | LKDGMRQVGQPYTDQSVRTLMLTQAYSSGTPVRSQSEIARIWVAPYLDTDGDLNDQSFT                                    | 120 |
| PID1       | LKDGMRQVGQPYTDQSVRTLMLTQAYSSGTPVRSQSEIARIWVAPYLDTDGDLNDQSFT                                    | 120 |
| PID18      | LKDGMRQVGQPYTDQSVRTLMLTQAYSSGTPVRSQSEIARIWVAPYLDTDGDLNDQSFT                                    | 120 |
| PID332     | LKDGMRQVGQPYTDQSVRTLMLTQAYSSGTPVRSQSEIARIWVAPYLDTDGDLNDQSFT                                    | 120 |
| SK-93-1035 | LKDGMRQVGQPYTDQSVRTLMLTQAYSSGTPVRSQSEIARIWVAPYLDTDGDLNDQSFT                                    | 120 |
| MC         | LKDGMRQVGQPYTDQSVRTLMLTQAYSSGTPVRSQSEIARIWVAPYLDTDGDLNDQSFT                                    | 120 |
|            |                                                                                                |     |
| DGI2       | YVVLNQGDLIAHNGQOIINEYRPIRLLGDGAKTSGSSVETSPTNSNNTNDRIPDVGVNL                                    | 180 |
| FA19       | YVVLNQGDLIAHNGQOIINEYRPIRLLGDGAKTSGSSVETSPTNSNNTNDRIPDVGVNL                                    | 180 |
| MS11       | YVVLNQGDLIAHNGQOIINEYRPIRLLGDGAKTSGSSVETSPTNSNNTNDRIPDVGVNL                                    | 180 |
| NCCP11945  | YVVLNQGDLIAHNGQOIINEYRPIRLLGDGAKTSGSSVETSPTNSNNTNDRIPDVGVNL                                    | 180 |
| PID1       | YVVLNQGDLIAHNGQOIINEYRPIRLLGDGAKTSGSSVETSPTNSNNTNDRIPDVGVNL                                    | 180 |
| PID18      | YVVLNQGDLIAHNGQOIINEYRPIRLLGDGAKTSGSSVETSPTNSNNTNDRIPDVGVNL                                    | 180 |
| PID332     | YVVLNQGDLIAHNGQOIINEYRPIRLLGDGAKTSGSSVETSPTNSNNTNDRIPDVGVNL                                    | 180 |
| SK-93-1035 | YVVLNQGDLIAHNGQOIINEYRPIRLLGDGAKTSGSSVETSPTNSNNTNDRIPDVGVNL                                    | 180 |
| MC         | YVVLNQGDLIAH <b>NQ</b> OI <b>I</b> DEYRPIRLL <b>GN</b> GAKT <b>SDSTVDPS</b> STNSNNTNDRIPDVGVNL | 180 |
|            |                                                                                                |     |
| DGI2       | HLQETSGIPGTVR                                                                                  | 193 |
| FA19       | HLQETSGIPGTVR                                                                                  | 193 |
| MS11       | HLQETSGIPGTVR                                                                                  | 193 |
| NCCP11945  | HLQETSGIPGTVR                                                                                  | 193 |
| PID1       | HLQETSGIPGTVR                                                                                  | 193 |
| PID18      | HLQETSGIPGTVR                                                                                  | 193 |
| PID332     | HLQETSGIPGTVR                                                                                  | 193 |
| SK-93-1035 | HLQETSGIPGTVR                                                                                  | 193 |
| MC         | <b>N</b> LQETSGIPG <b>T</b> <b>T</b> R                                                         | 193 |

**Figure S2.** Alignment of the amino acid sequence of TraV from eight sequenced *Neisseria gonorrhoeae* strains carrying the GGI. A representative *N. meningitidis* strain (MC:  $\alpha$ 275) is included for reference. Non-conserved amino acids are highlighted in gray.

|            |                                                                             |     |
|------------|-----------------------------------------------------------------------------|-----|
| DGI2       | MRVKVNKFKLSAARKRQLA IAGMVAGSMAA I VGS AIYVIEGNKKKSAEVTQVQNK RQILRTDFTSPQAGI | 70  |
| NCCP11945  | MRVKVNKFKLSAARKRQLA IAGMVAGSMAA I VGS AIYVIEGNKKKSAEVTQVQNK RQILRTDFTSPQAGI | 70  |
| PID18      | MRVKVNKFKLSAARKRQLA IAGMVAGSMAA I VGS AIYVIEGNKKKSAEVTQVQNK RQILRTDFTSPQAGI | 70  |
| SK-93-1035 | MRVKVNKFKLSAARKRQLA IAGMVAGSMAA I VGS AIYVIEGNKKKSAEVTQVQNK RQILRTDFTSPQAGI | 70  |
| PID1       | MRVKVNKFKLSAARKRQLA IAGMVAGSMAA I VGS AIYVIEGNKKKSAEVTQVQNK RQILRTDFTSPQAGI | 70  |
| PID332     | MRVKVNKFKLSAARKRQLA IAGMVAGSMAA I VGS AIYVIEGNKKKSAEVTQVQNK RQILRTDFTSPQAGI | 70  |
| MS11       | MRVKVNKFKLSAARKRQLA IAGMVAGSMAA I VGS AIYVIEGNKKKSAEVTQVQNK RQILRTDFTSPQAGI | 70  |
| FA19       | MRVKVNKFKLSAARKRQLA IAGMVAGSMAA I VGS AIYVIEGNKKKSAEVTQVQNK RQILRTDFTSPQAGI | 70  |
| MC         | MRVKVNKFKLSAARKRQLA IAGMVAGSMAA I VGS AIYVIEGNKKKSAEVTQVQNK RQILRTDFTSPQAGI | 70  |
|            |                                                                             |     |
| DGI2       | TDNSLWMNTESSKIEYANRK I SELETMVQELKEKENS NPDT SKGLGPDGLGKPPA ISGIGDNGR LPPAP | 140 |
| NCCP11945  | TDNSLWMNTESSKIEYANRK I SELETMVQELKEKENS NPDT SKGLGPDGLGKPPA ISGIGDNGR LPPAP | 140 |
| PID18      | TDNSLWMNTESSKIEYANRK I SELETMVQELKEKENS NPDT SKGLGPDGLGKPPA ISGIGDNGR LPPAP | 140 |
| SK-93-1035 | TDNSLWMNTESSKIEYANRK I SELETMVQELKEKENS NPDT SKGLGPDGLGKPPA ISGIGDNGR LPPAP | 140 |
| PID1       | TDNSLWMNTESSKIEYANRK I SELETMVQELKEKENS NPDT SKGLGPDGLGKPPA ISGIGDNGR LPPAP | 140 |
| PID332     | TDNSLWMNTESSKIEYANRK I SELETMVQELKEKENS NPDT SKGLGPDGLGKPPA ISGIGDNGR LPPAP | 140 |
| MS11       | TDNSLWMNTESSKIEYANRK I SELETMVQELKEKENS NPDT SKGLGPDGLGKPPA ISGIGDNGR LPPAP | 140 |
| FA19       | TDNSLWMNTESSKIEYANRK I SELETMVQELKEKENS NPDT SKGLGPDGLGKPPA ISGIGDNGR LPPAP | 140 |
| MC         | TDNSLWMNTESSKIEYANRK I SELETMVQELKEKENS NPDT SKGLGPDGLGKPPA ISGIGDNGR LPPAP | 140 |
|            |                                                                             |     |
| DGI2       | PAGTLPNGAPPADRPIERKI VSGSMSEAE LQP GTTGSVNTGNPNENVRVSPQLKEAEWVKSTPRMNIEV    | 210 |
| NCCP11945  | PAGTLPNGAPPADRPIERKI VSGSMSEAE LQP GTTGSVNTGNPNENVRVSPQLKEAEWVKSTPRMNIEV    | 210 |
| PID18      | PAGTLPNGAPPADRPIERKI VSGSMSEAE LQP GTTGSVNTGNPNENVRVSPQLKEAEWVKSTPRMNIEV    | 210 |
| SK-93-1035 | PAGALPNGAPPADRPIERKI VSGSMSEAE LQP GTTGSVNTGNPNENVRVSPQLKEAEWVKSTPRMNIEV    | 210 |
| PID1       | PAGTLPNGAPPADRPIERKI VSGSMSEAE LQP GTTGSVNTGNPNENVRVSPQLKEAEWVKSTPRMNIEV    | 210 |
| PID332     | PAGTLPNGAPPADRPIERKI VSGSMSEAE LQP GTTGSVNTGNPNENVRVSPQLKEAEWVKSTPRMNIEV    | 210 |
| MS11       | PAGTLPNGAPPADRPIERKI VSGSMSEAE LQP GTTGSVNTGNPNENVRVSPQLKEAEWVKSTPRMNIEV    | 210 |
| FA19       | PAGTLPNGAPPADRPIERKI VSGSMSEAE LQP GTTGSVNTGNPNENVRVSPQLKEAEWVKSTPRMNIEV    | 210 |
| MC         | PAGTLPNGAPPADRPIERKI VSGSMSEAE LQP GTTGSVNTGNPNENVRVSPQLKEAEWVKSTPRMNIEV    | 210 |
|            |                                                                             |     |
| DGI2       | VEDGGKVVVSQGKFRARDSY IPSGTFFRS VLLGGVDAPTGGEAQNASPHVLMRVTDFAQLPNRFKYNFR     | 280 |
| NCCP11945  | VEDGGKVVVSQGKFRARDSY IPSGTFFRS VLLGGVDAPTGGEAQNASPHVLMRVTDFAQLPNRFKYNFR     | 280 |
| PID18      | VEDGGKVVVSQGKFRARDSY IPSGTFFRS VLLGGVDAPTGGEAQNASPHVLMRVTDFAQLPNRFKYNFR     | 280 |
| SK-93-1035 | VEDGGKVVVSQGKFRARDSY IPSGTFFRS VLLGGVDAPTGGEAQNASPHVLMRVTDFAQLPNRFKYNFR     | 280 |
| PID1       | VEDGGKVVVSQGKFRARDSY IPSGTFFRS VLLGGVDAPTGGEAQNASPHVLMRVTDFAQLPNRFKYNFR     | 280 |
| PID332     | VEDGGKVVVSQGKFRARDSY IPSGTFFRS VLLGGVDAPTGGEAQNASPHVLMRVTDFAQLPNRFKYNFR     | 280 |
| MS11       | VEDGGKVVVSQGKFRARDSY IPSGTFFRS VLLGGVDAPTGGEAQNASPHVLMRVTDFAQLPNRFKYNFR     | 280 |
| FA19       | VEDGGKVVVSQGKFRARDSY IPSGTFFRS VLLGGVDAPTGGEAQNASPHVLMRVTDFAQLPNRFKYNFR     | 280 |
| MC         | VEDGGKVVVSQGKFRARDSY IPSGTFFRS VLLGGVDAPTGGEAQNASPHVLMRVTDFAQLPNRFKYNFR     | 280 |
|            |                                                                             |     |
| DGI2       | ECFVTGQAYGDISSERAY IRLQNLSCVGTDGRAIDMPVKGYVAGEDGKTGVRGNLVTKQGQLLANALMSG     | 350 |
| NCCP11945  | ECFVTGQAYGDISSERAY IRLQNLSCVGTDGRAIDMPVKGYVAGEDGKTGVRGNLVTKQGQLLANALMSG     | 350 |
| PID18      | ECFVTGQAYGDISSERAY IRLQNLSCVGTDGRAIDMPVKGYVAGEDGKTGVRGNLVTKQGQLLANALMSG     | 350 |
| SK-93-1035 | ECFVTGQAYGDISSERAY IRLQNLSCVGTDGRAIDMPVKGYVAGEDGKTGVRGNLVTKQGQLLANALMSG     | 350 |
| PID1       | ECFVTGQAYGDISSERAY IRLQNLSCVGTDGRAIDMPVKGYVAGEDGKTGVRGNLVTKQGQLLANALMSG     | 350 |
| PID332     | ECFVTGQAYGDISSERAY IRLQNLSCVGTDGRAIDMPVKGYVAGEDGKTGVRGNLVTKQGQLLANALMSG     | 350 |
| MS11       | ECFVTGQAYGDISSERAY IRLQNLSCVGTDGRAIDMPVKGYVAGEDGKTGVRGNLVTKQGQLLANALMSG     | 350 |
| FA19       | ECFVTGQAYGDISSERAY IRLQNLSCVGTDGRAIDMPVKGYVAGEDGKTGVRGNLVTKQGQLLANALMSG     | 350 |
| MC         | ECFVTGQAYGDISSERAY IRLQNLSCVGTDGRAIDMPVKGYVAGEDGKTGVRGNLVTKQGQLLANALMSG     | 350 |
|            |                                                                             |     |
| DGI2       | VISGMGKGVSEAFKVTNNTAFGSTTTSIRGSDQYRAGIASGIGGAADRLAEYYIKLADKVPVVEVNAGRQ      | 420 |
| NCCP11945  | VISGMGKGVSEAFKVTNNTAFGSTTTSIRGSDQYRAGIASGIGGAADRLAEYYIKLADKVPVVEVNAGRQ      | 420 |
| PID18      | VISGMGKGVSEAFKVTNNTAFGSTTTSIRGSDQYRAGIASGIGGAADRLAEYYIKLADKVPVVEVNAGRQ      | 420 |
| SK-93-1035 | VISGMGKGVSEAFKVTNNTAFGSTTTSIRGSDQYRAGIASGIGGAADRLAEYYIKLADKVPVVEVNAGRQ      | 420 |
| PID1       | VISGMGKGVSEAFKVTNNTAFGSTTTSIRGSDQYRAGIASGIGGAADRLAEYYIKLADKVPVVEVNAGRQ      | 420 |
| PID332     | VISGMGKGVSEAFKVTNNTAFGSTTTSIRGSDQYRAGIASGIGGAADRLAEYYIKLADKVPVVEVNAGRQ      | 420 |
| MS11       | VISGMGKGVSEAFKVTNNTAFGSTTTSIRGSDQYRAGIASGIGGAADRLAEYYIKLADKVPVVEVNAGRQ      | 420 |
| FA19       | VISGMGKGVSEAFKVTNNTAFGSTTTSIRGSDQYRAGIASGIGGAADRLAEYYIKLADKVPVVEVNAGRQ      | 420 |
| MC         | VISGMGKGVSEAFKVTNNTAFGSTTTSIRGSDQYRAGIASGIGGAADRLAEYYIKLADKVPVVEVNAGRQ      | 420 |
|            |                                                                             |     |
| DGI2       | VDVVL TQGI EIDTGETK 437                                                     |     |
| NCCP11945  | VDVVL TQGI EIDTGETK 437                                                     |     |
| PID18      | VDVVL TQGI EIDTGETK 437                                                     |     |
| SK-93-1035 | VDVVL TQGI EIDTGETK 437                                                     |     |
| PID1       | VDVVL TQGI EIDTGETK 437                                                     |     |
| PID332     | VDVVL TQGI EIDTGETK 437                                                     |     |
| MS11       | VDVVL TQGI EIDTGETK 437                                                     |     |
| FA19       | VDVVL TQGI EIDTGETK 437                                                     |     |
| MC         | VDVVL TQGI EIDTGETK 437                                                     |     |

**Figure S3.** Alignment of the amino acid sequence of TraB from eight sequenced *Neisseria gonorrhoeae* strains carrying the GGI. A representative *N. meningitidis* strain (MC:  $\alpha$ 275) is included for reference. Non-conserved amino acids are highlighted in gray.

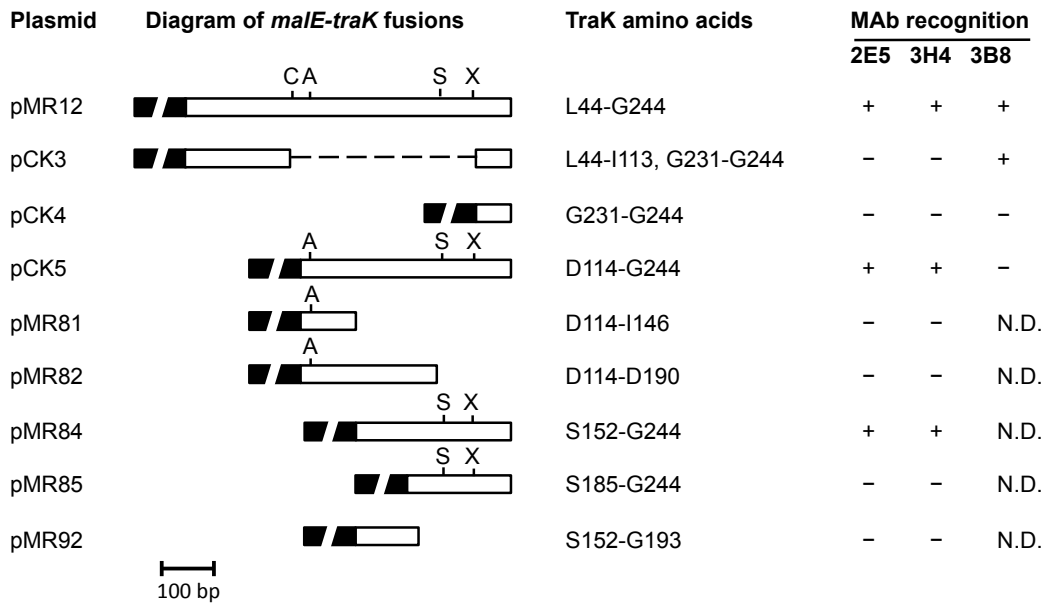

**Figure S4.** Characterization of monoclonal antibodies for TraK. Epitopes for three monoclonal antibodies (2E5, 3H4, and 3B8) were determined using MBP-TraK fusions. A series of plasmids was constructed in which different lengths of *traK* were fused to *malE*. The MBP-TraK fusion proteins were expressed in *E. coli*, and Western blots were performed on *E. coli* lysates with each monoclonal antibody. In the plasmid diagrams, the broken black rectangle represents *malE*, while the white rectangle indicates the portion of the *traK* sequence expressed in each fusion. Several restriction sites in TraK are indicated for reference: ClaI (C), AgeI (A), StuI (S), XmaI (X). The TraK amino acids expressed from each fusion are also indicated. The reactivity of the monoclonal antibodies to each fusion protein was determined by immunoblot. +, detection in immunoblot; -, no detection in immunoblot; N.D., reactivity not determined.

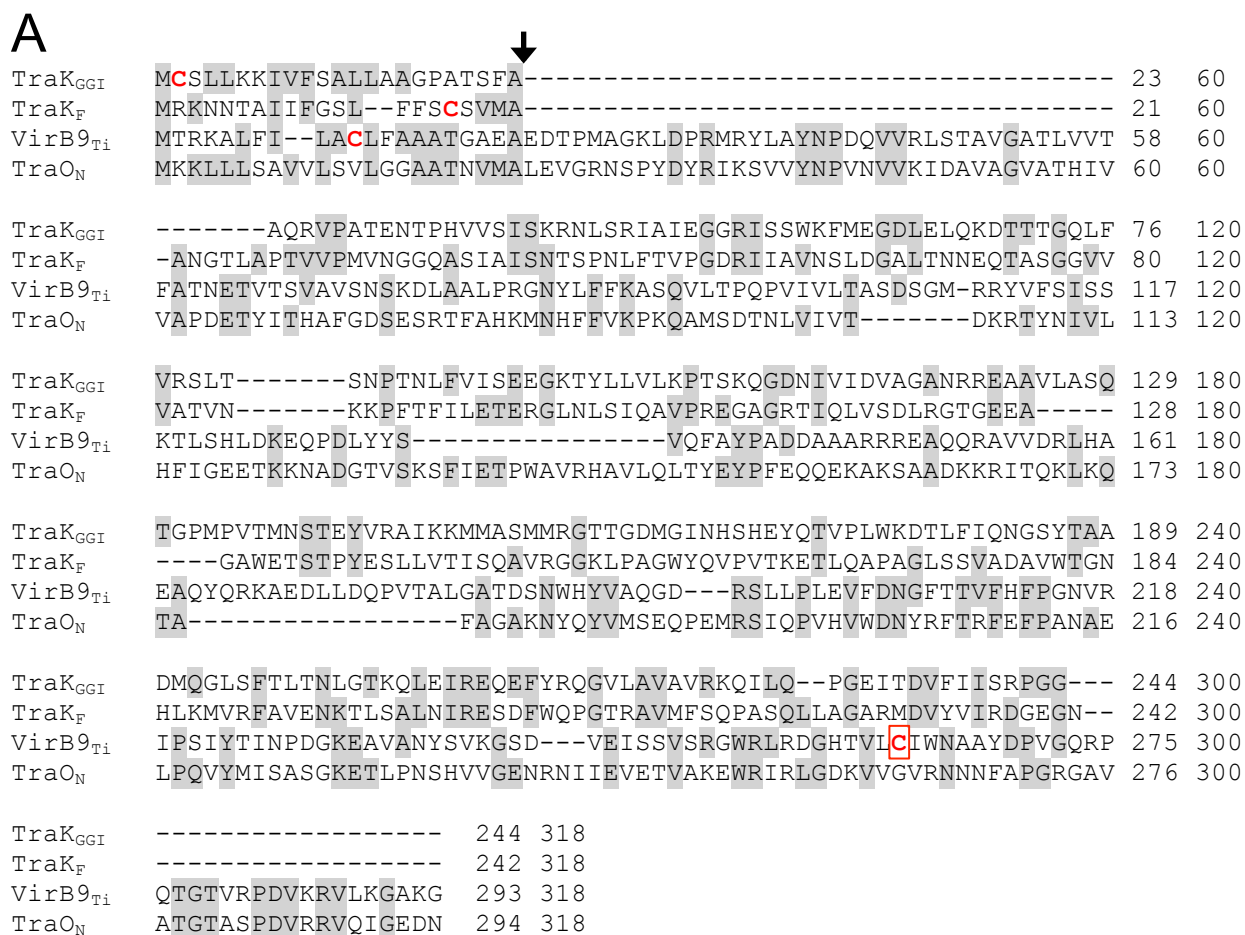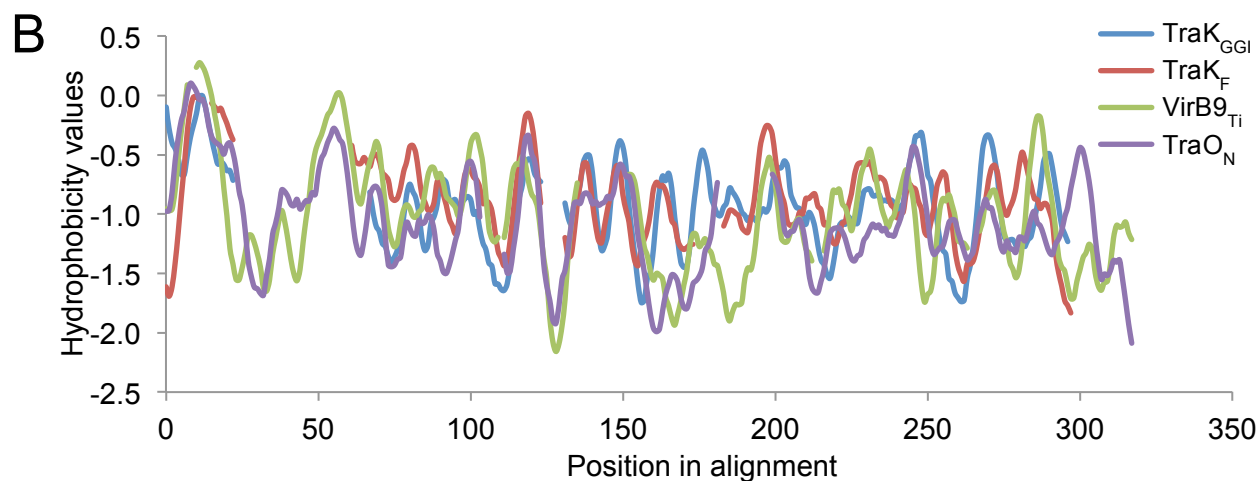

**Figure S5.** Alignment of TraK<sub>GGI</sub> homologs. **(A)** Alignment of gonococcal TraK (TraK<sub>GGI</sub>, NCBI Accession No. AAW83065) with homologs from F plasmid (TraK<sub>F</sub>, NCBI Accession No. BAA97947), pKM101 (TraO<sub>N</sub>, NCBI Accession No. AAA86458), and *A. tumefaciens* (VirB9 encoded by pTi15955, NCBI Accession No. CAA29979) using AlignMe (Alignment of Membrane Proteins) (2, 3). Identical residues are highlighted in gray. The arrow indicates the predicted Sec-dependent signal peptide cleavage site (SignalP) (4). Cysteines are in red, with the VirB9<sub>Ti</sub> cysteine that contributes to the disulphide bridge with VirB7<sub>Ti</sub> also boxed. The first column of numbers on the right is the amino acid number in each protein. The second column of numbers is the position in the overall alignment. **(B)** Hydrophobicity plot of the alignment (2, 3).

**A**

|                     |                                                                 |     |     |  |
|---------------------|-----------------------------------------------------------------|-----|-----|--|
|                     | *                                                               |     |     |  |
| TraV <sub>GGI</sub> | MMRLKALSITAAIILILSGCSTL-----TMSGIGGSEKFRCPNARNSDDPYCESIS        | 51  | 60  |  |
| TraV <sub>F</sub>   | MKQTSFFIPLLGLTLLLYGCAGTSTEFECNATTSDTCTMTMEQANEKAKKLLERSSEAKPVAA | 60  | 60  |  |
| VirB7 <sub>Ti</sub> | ----MKYCLLCLVVALSGCQTNDTIASCKGPIFPLNVGRWQPTPSDLQLRNSGGRYDGA-    | 55  | 60  |  |
| TraN <sub>N</sub>   | ----MRSLLLMGVLLISACSSGHKPPPEPDWSNTVPVNKTIPV-----DTQGGRNES-      | 48  | 60  |  |
|                     |                                                                 |     |     |  |
| TraV <sub>GGI</sub> | NY-----KASVAGVLKDGMRQVGQPYTDQSVRTLMLTQAYSSGT-----               | 91  | 120 |  |
| TraV <sub>F</sub>   | SLPRLAEGNFRTMPVQTVTATTPSGSRPAVTAHPEQKLLAPRPLFTAAREVKTIVVPVSSV   | 120 | 120 |  |
| VirB7 <sub>Ti</sub> | -----                                                           | 55  | 120 |  |
| TraN <sub>N</sub>   | -----                                                           | 48  | 120 |  |
|                     |                                                                 |     |     |  |
| TraV <sub>GGI</sub> | -----PVRSQSEIARIWVAPYLDTDGDLNDQSFYVVLNQGDWLI AHNGQOIINEYRP      | 144 | 180 |  |
| TraV <sub>F</sub>   | TPVTPPRPLRTGEQTAALWIAPIYIDNQDVYHQSSVFFVIKPSAWGKPRIN-----        | 171 | 180 |  |
| VirB7 <sub>Ti</sub> | -----                                                           | 55  | 180 |  |
| TraN <sub>N</sub>   | -----                                                           | 48  | 180 |  |
|                     |                                                                 |     |     |  |
| TraV <sub>GGI</sub> | IRLLGDGAKTSGSSVETSPTNSNNTNDRI PDVGVNLHLQETSGIPGTVR              | 193 | 229 |  |
| TraV <sub>F</sub>   | -----                                                           | 171 | 229 |  |
| VirB7 <sub>Ti</sub> | -----                                                           | 55  | 229 |  |
| TraN <sub>N</sub>   | -----                                                           | 48  | 229 |  |

**B**

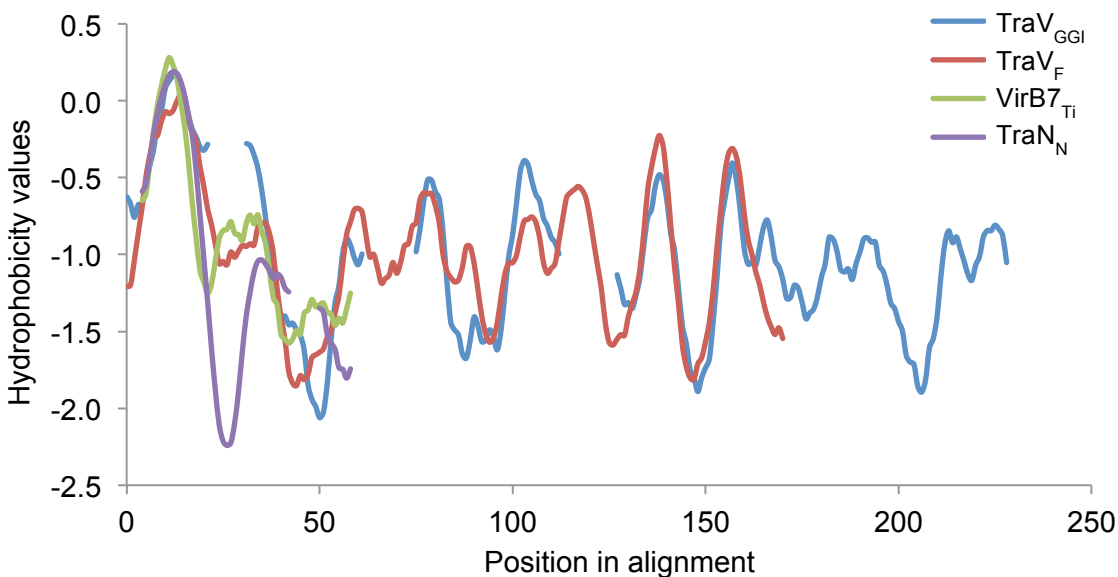

**Figure S6.** Alignment of TraV<sub>GGI</sub> homologs. **(A)** Alignment of gonococcal TraV (TraV<sub>GGI</sub>, NCBI Accession No. AAW83068) with homologs from F plasmid (TraV<sub>F</sub>, NCBI Accession No. BAA97952), pKM101 (TraN<sub>N</sub>, NCBI Accession No. AAA86456), and *A. tumefaciens* (VirB7 encoded by pTi15955, NCBI Accession No. CAC15164) using AlignMe (Alignment of Membrane Proteins) (2, 3). Identical residues are highlighted in gray. Cysteines are shown in red, with the N-terminal lipidated cysteines indicated by an asterisk. Cys24 in VirB7<sub>Ti</sub>, which contributes to the disulphide bridge with VirB9, is boxed (5). The first set of numbers on the right is the amino acid number in each protein. The second set of numbers of the position in the overall alignment. **(B)** Hydrophobicity plot of the alignment generated using AlignMe (2, 3).



**B**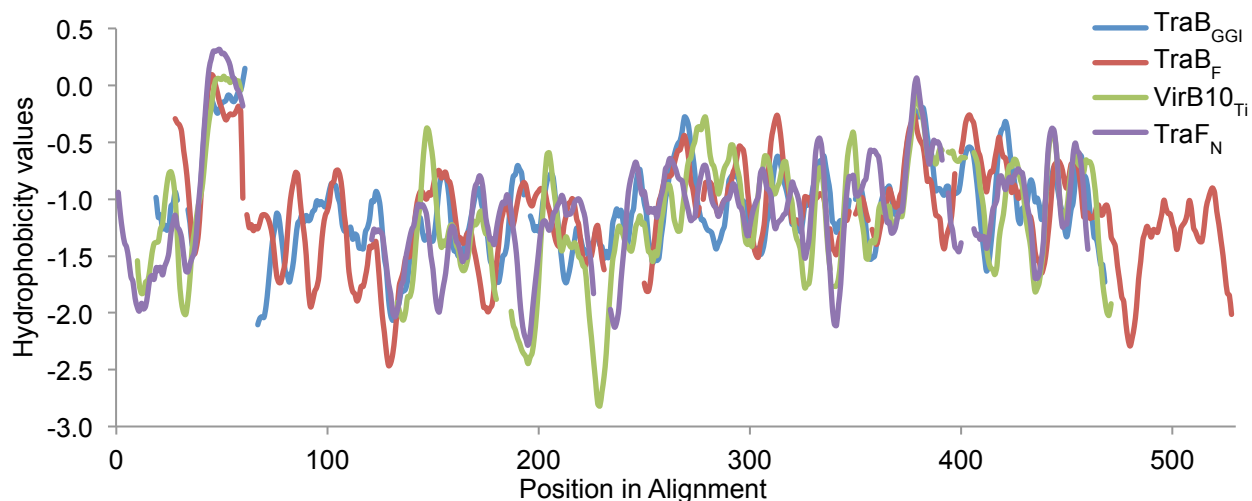

**Figure S7. (A)** Alignment of gonococcal TraB (TraB<sub>GGI</sub>, NCBI Accession No. AAW83066) with homologs from F plasmid (TraB<sub>F</sub>, NCBI Accession No. BAA97948), pKM101 (TraF<sub>N</sub>, NCBI Accession No. AAA86459), and *A. tumefaciens* (VirB10 encoded by pTi15955, NCBI Accession No. CAA29981) using AlignMe (Alignment of Membrane Proteins) (2, 3). Identical residues are highlighted in gray. The alpha helix predicted to span the inner membrane ( $\alpha$ 1) is labeled and underlined (predicted using the TMHMM Server v. 2.0) (6). The highly conserved GxxGxxG motif involved in channel gating in *A. tumefaciens* is indicated with asterisks (7). The alpha helices that form the outer membrane pore ( $\alpha$ 2 and  $\alpha$ 3) in the TraF<sub>N</sub> crystal structure are indicated by boxes (8). The predicted alpha helical regions in VirB10<sub>Ti</sub>, TraB<sub>GGI</sub>, and TraB<sub>F</sub> are underlined (Phyre2) (9). The alignment was generated by manually dividing the amino acid sequences into two regions (after the  $\alpha$ 1 helix) and aligning the two regions separately. **(B)** Hydrophobicity plot of the alignment generated using AlignMe (2, 3).



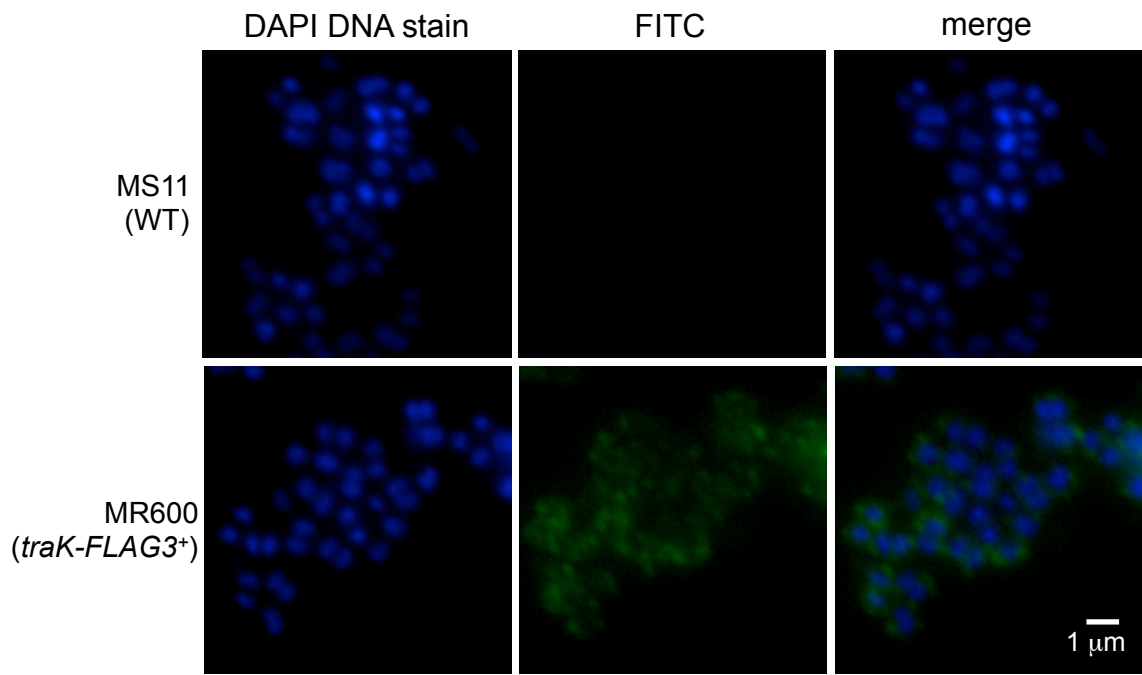

**Figure S8.** Immunofluorescence microscopy for TraK-FLAG3 in MS11 (WT) and MR600 (*traK-FLAG3<sup>+</sup>*). The DAPI DNA stain was used to counterstain the cells. A FITC-conjugated secondary antibody was used to detect TraK-FLAG3.

## References

1. **Woodhams KL, Benet ZL, Blonsky SE, Hackett KT, Dillard JP.** 2012. Prevalence and detailed mapping of the gonococcal genetic island in *Neisseria meningitidis*. *J. Bacteriol.* **194**:2275-2285.
2. **Stamm M, Staritzbichler R, Khafizov K, Forrest LR.** 2013. Alignment of helical membrane protein sequences using AlignMe. *PLoS One* **8**:e57731.
3. **Khafizov K, Staritzbichler R, Stamm M, Forrest LR.** 2010. A study of the evolution of inverted-topology repeats from LeuT-fold transporters using AlignMe. *Biochemistry* **49**:10702-10713.
4. **Petersen TN, Brunak S, von Heijne G, Nielsen H.** 2011. SignalP 4.0: discriminating signal peptides from transmembrane regions. *Nat. Meth.* **8**:785-786.
5. **Spudich GM, Fernandez D, Zhou XR, Christie PJ.** 1996. Intermolecular disulfide bonds stabilize VirB7 homodimers and VirB7/VirB9 heterodimers during biogenesis of the *Agrobacterium tumefaciens* T-complex transport apparatus. *Proc. Natl. Acad. Sci. U. S. A.* **93**:7512-7517.
6. **Jakubowski SJ, Kerr JE, Garza I, Krishnamoorthy V, Bayliss R, Waksman G, Christie PJ.** 2009. *Agrobacterium* VirB10 domain requirements for type IV secretion and T pilus biogenesis. *Mol. Microbiol.* **71**:779-794.
7. **Banta LM, Kerr JE, Cascales E, Giuliano ME, Bailey ME, McKay C, Chandran V, Waksman G, Christie PJ.** 2011. An *Agrobacterium* VirB10 mutation conferring a type IV secretion system gating defect. *J. Bacteriol.* **193**:2566-2574.
8. **Chandran V, Fronzes R, Duquerroy S, Cronin N, Navaza J, Waksman G.** 2009. Structure of the outer membrane complex of a type IV secretion system. *Nature* **462**:1011-1015.

9. **Kelley LA, Sternberg MJ.** 2009. Protein structure prediction on the Web: a case study using the Phyre server. *Nat. Protoc.* **4**:363-371.
